# Supplementary material for: Cutaneous, mucocutaneous and visceral leishmaniasis in Sweden from 1996–2016: a retrospective study of clinical characteristics, treatments and outcomes
Source: Springer Nature journal article supplement (doi:10.1186/s12879-018-3539-1), 2018-12-01

# Country of origin of infection

Number of cases   
1 50

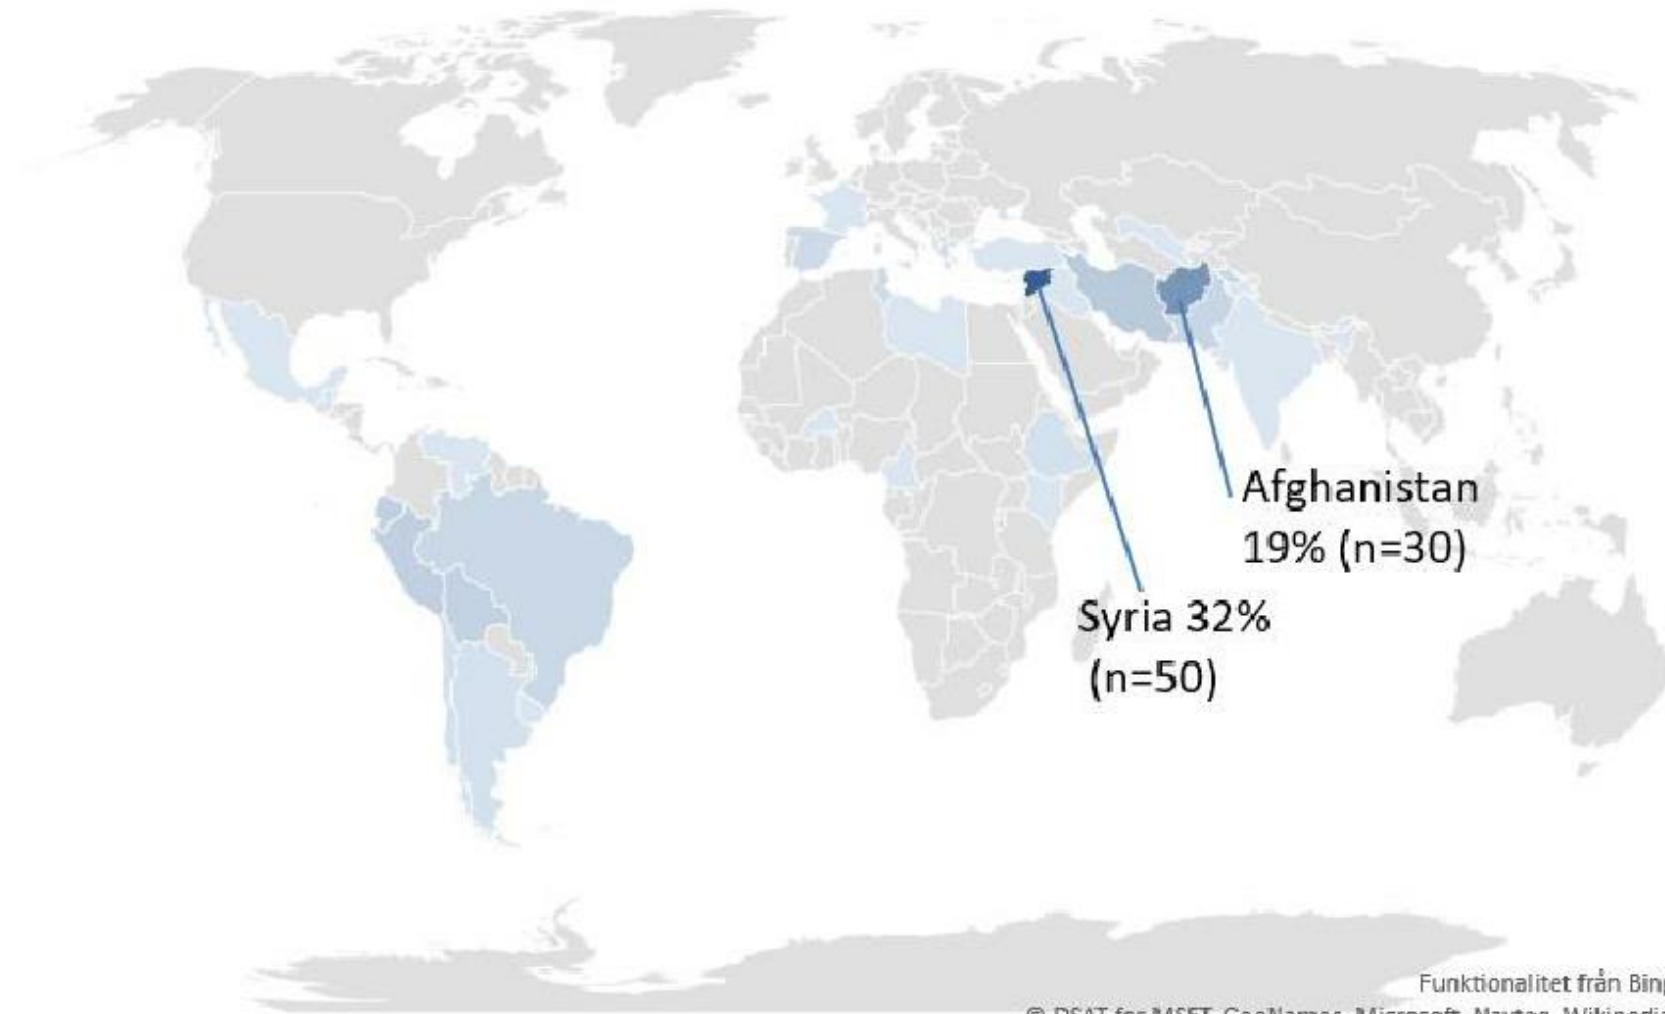

Supplement: MOESM1 [file 16324560]
